1  
2  
3  
4  
5  
6  
7  
8  
9  
10  
11  
12  
13  
14  
15  
16  
17  
18  
19  
20  
21  
22  
23  
24  
25  
26  
27  
28  
29  
30  
31  
32  
33  
34

**Investigating the levels of polychlorinated biphenyls (PCBs) at three lactational stages: A comprehensive study in Ghana**

35 **Polychlorinated biphenyl levels at lactational stages, Ghana**

36

37

38 **Authors**

39 \*\*Justice Wiston Amstrong Jonathan<sup>1,2</sup> [jjonathan@uhas.edu.gh](mailto:jjonathan@uhas.edu.gh)

40 Daniel Elorm Kwame Kabotso<sup>2</sup>; [ekabotso@uhas.edu.gh](mailto:ekabotso@uhas.edu.gh)

41 David K. Essumang<sup>1</sup> [dessumang@ucc.edu.gh](mailto:dessumang@ucc.edu.gh)

42 John K. Bentum<sup>1</sup> [jkbentum@ucc.edu.gh](mailto:jkbentum@ucc.edu.gh)

43 Francis Ofosu-Koranteng<sup>3</sup> [francis.ofosu-koranteng@gsa.gov.gh](mailto:francis.ofosu-koranteng@gsa.gov.gh)

44 Hintermann Mbroh<sup>4</sup> [mbromk@yahoo.com](mailto:mbromk@yahoo.com)

45 John Tampuori<sup>4</sup> [jtampuori@yahoo.com](mailto:jtampuori@yahoo.com)

46

47 **Author Details**

48 \*\*Corresponding Author

49 <sup>1</sup>Department of Chemistry, University of Cape, UCC

50 <sup>2</sup>Department of Basic Sciences, School of Basic and Biomedical Sciences, UHAS

51 <sup>3</sup>Pesticide Residues Laboratory, Ghana Standards Authority, GSA

52 <sup>4</sup>Department of Gynaecology, Ho Teaching Hospital, HTH

53

54

55

56

57

58

59

60

61

62

63 **Abstract**

64 **Introduction:** The human breast secretes three types of milk during lactation – colostrum,  
65 transitional milk and mature milk However, like any other biofluid, human breast milk is not  
66 pristine

67 **Objectives:** The objectives of this study was to determine the levels of polychlorinated  
68 biphenyls congeners in colostrum, transitional milk and mature milk of mothers at the Ho  
69 Teaching Hospital to ascertain which portion contained the highest levels of PCPBs that could  
70 pose any significant health risks to neonates.

71 **Methodology:** A cross-sectional study design was employed to conduct the study at the Ho  
72 Teaching Hospital. Protocol for the study was reviewed and approved by the University of  
73 Health and Allied Sciences Research Ethics Committee (UHAS–REC). The study recruited  
74 forty-seven (47) mothers using purposive sampling. About 10.0 g of each aliquot of colostrum,  
75 transitional milk and mature milk were treated using a modified form of QuEChERS to extract  
76 PCBs and the resulting extract analyzed for fourteen (14) PCB congeners using GC–MS/MS.

77 **Results:** Fourteen (14) PCB congeners were examined in all the 141 breast samples, which  
78 represented three different types of human milk. All samples had levels that were below  
79 thresholds of detection. The lack of PCB residues in the examined samples may be viewed as  
80 positive news. It might suggest that the mothers were only minimally exposed to these industrial  
81 pollutants.

82 **Conclusion:** At any stage of lactation, no PCBs were found in the breast milk samples. As a  
83 result, there were no obvious health concerns for breastfed infants from the levels of PCBs found  
84 in the samples of breast milk that were examined. The result is good news for international  
85 efforts to eliminate PCBs in the environment and on people.

86  
87 **Key words: polychlorinated biphenyl, colostrum, transition milk, mature milk, congener,**  
88 **neonate**

89

90

91

92

93

94

95

96

97

## 98 **Introduction**

99 The importance of human breast milk as an ideal source of nutrition for the healthy growth and  
100 development of infants can never be underestimated. Accordingly, health organizations around  
101 the world continue to support and promote breastfeeding among mothers. It is in recognition of  
102 this fact that the World Health Organization has recommended exclusive breastfeeding for new-  
103 borns for at least, the first six months after birth (1,2). This is significant because it is the surest  
104 way to ensure good health and survival of infants. However, breast milk as biofluid is not  
105 pristine (3). Contaminants in breast milk can either be transferred from mother to foetus during  
106 intra-uterine development or through breastfeeding during lactation. Notable among  
107 environmental chemicals that contaminate human breast milk are polychlorinated biphenyls  
108 (PCBs) (4).

109 Polychlorinated biphenyls (PCBs) are mixtures of synthetic chlorinated hydrocarbons that have  
110 been used extensively since 1930 in a variety of industrial applications, such as dielectrics in  
111 transformers and large capacitors, as heat exchange fluids, as paint additives, in carbonless copy  
112 paper and in plastics (5,6). There are 209 possible congeners of PCBs. PCBs are among a group  
113 of 12 harmful organic chemicals known as the “Dirty Dozen” earmarked by the Stockholm  
114 Convention for elimination or severely restricting their production. A notable property of PCBs  
115 is general inertness. PCBs are resistant to acids and bases and possess thermal stability, making  
116 them useful in a wide range of applications, such as dielectric fluids in transformers and  
117 capacitors, heat transfer fluids and lubricants (7,8).

118 Chemical stability and lipophilicity of PCBs enable them to bioaccumulate and biomagnify in  
119 body tissues. In addition to their resistance to metabolism enhances their ability to persist in the  
120 environment for a long time. PCBs may associate with the organic components of soils,

121 sediments and biological tissues, or with dissolved organic carbon in aquatic systems, rather than  
122 being in solution in water. Reports on human health effects of PCBs range from carcinogenicity,  
123 genotoxicity, reproductive toxicity, immunotoxicity and neurochemical effects (9). Research  
124 indicates that PCBs in humans can lead to increased rates melanomas, liver cancer, gall bladder  
125 cancer, brain cancer, gastrointestinal tract cancer, bacillary tract cancer and even breast cancer  
126 (10–16). Exposure to PCBs has the potential to suppress the human body immune responses and  
127 thereby increase the risk of acquiring other human diseases (10,17,18). Association between  
128 elevated exposure to PCB mixtures and alterations in liver enzymes, hepatomegaly, and  
129 dermatological effects such as rashes and acne has been reported. Adverse effects are  
130 predominantly associated with higher blood concentrations.

131 Many people were exposed to PCBs and other toxins such as polychlorinated dibenzofurans  
132 (PCDFs) as a result of the contamination of rice oil by PCBs in Taiwan, China (1979) and  
133 Japan (1968). According to (19–21) pigmentation of the nail and mucous membrane is one of the  
134 signs and symptoms of exposure from these incidents, as well as enlargement and hypersecretion  
135 of the Meibomian glands of the eyes, swelling of the eyelids, and mucous membrane swelling.  
136 Hyperkeratosis and skin darkening with enlarged follicles and acne-like outbreaks ensued  
137 (frequently with staphylococcal infection) (22). Children born in the Taiwan event up to 7 years  
138 after maternal exposure showed hyperpigmentation, malformed nails, and natal teeth (23). Along  
139 with behavioural issues and increased levels of activity, they also had intrauterine growth  
140 retardation, worse cognitive development up to age 7, and intrauterine growth delay. At age 12,  
141 the impacted kids appeared to "catch up" with the controls. Children who were born 7 to 12 years  
142 after their mothers were exposed to PCBs had mildly delayed development, but their behaviour  
143 was not significantly different from that of children who had not been exposed (24). The

144 problems seen in these kids are probably due to PCBs' long-lasting effects in the body, which led  
145 to exposure during pregnancy years after the first exposure (24,25).

146 These effects are consistent with the observations of poorer short-term memory functioning in  
147 early childhood, in children exposed prenatally by mothers who had high consumption of Lake  
148 Michigan sports fish containing PCBs, amongst other persistent organic pollutants (POPs).  
149 People exposed in the Yucheng incident had low resistance to infections and suffered from a  
150 variety of them. Examination during the first year revealed decreased concentrations of IgM and  
151 IgA, decreased percentages of total T-cells, active T-cells and helper T-cells, but normal  
152 percentages of B-cells and suppressor T-cells; suppression of delayed type response to recalling  
153 antigens; enhancement of spontaneous proliferation of lymphocytes and an enhancement in  
154 lymphoproliferation to certain mitogens. After 3 years, some, although not all, of the effects had  
155 disappeared. Cancer deaths in both male and female workers involved in the manufacture of  
156 electrical capacitors were significantly increased. A significant increase in haematological  
157 neoplasms and gastrointestinal cancers was observed in male workers (9,19,20,26).  
158 Concentration factors in fish exposed to PCBs in their diet were lower than those for fish  
159 exposed to PCBs in water, suggesting that PCBs are bioconcentrated (taken up directly from the  
160 water) as opposed to being bioaccumulated (taken up by water and in food). The main source of  
161 PCB exposure to the general population is through food, especially fish (22).

162 PCBs concentrations in breast milk or in cord blood are dependent to the maternal PCB and  
163 dioxin body burden (27). This body burden is the result of PCB and dioxin-like accumulation  
164 over many years, especially in fat tissue, combined with low metabolic degradation and  
165 excretion rate (27). Most PCB monitoring studies were performed in Europe (28–32). Due to  
166 lack of standard measuring protocols, it is difficult to assess breast milk trends of PCB

167 contaminants. However, some researchers have speculated that, over the last 25 years, levels  
168 may have decreased slightly (33). In Sweden, Czech Republic and Germany, where data have  
169 been collected following fairly consistent methods over time, evidence of a downward trend has  
170 emerged (28,31,32). Studies evaluating PCB levels in women found that breast milk  
171 concentrations were 4–10 times higher than in blood (33).

172  
173 For example, in a study (34) reported a mean daily intake of 112–118 pg TEQ/kg bw in breast-  
174 fed infants and 6.3–6.5 pg TEQ/kg bw in 1- to 5-year-old children. “Maternal age is positively  
175 related, and the period of previous breast-feeding is negatively related to maternal PCB and  
176 dioxin-like concentrations” (27,35). Because more than 90% of the total daily human exposure to  
177 PCBs and dioxin-like chemicals is made up of oral intake from food, whereas other routes (e.g.  
178 water, air and soil) contribute less than 10% of total exposure (36), the role of diet has been  
179 investigated regarding breast milk pollution. In the U.S., fish consumption in the Great Lakes  
180 area has been associated with higher body burden of PCBs (37). In Canada, Inuit and fishing  
181 populations have higher PCB levels in breast milk than do urban population (Hirakawa et al.  
182 1995). In the Czech Republic, the use of PCB-containing paint in grain silos resulted in higher  
183 breast milk PCB levels compared to neighboring regions and countries .

184  
185 In a study (38) assessed the levels of PCBs in the breast milk of some Ghanaian women at  
186 suspected hotspot (Agbogbloshie) and relatively non-hotspot (Kwabenya) areas to ascertain if  
187 the levels of PCBs in mothers milk pose any health risk to the breastfed infants. A total of 128  
188 individual human breast milk samples were taken from both primiparae and multiparae  
189 (Agbogbloshie – 105 and Kwabenya – 23) and the samples were analyzed using GC – MS/MS.

190 Mean concentrations of PCBs from Agbogbloshie (hot-spot area) and Kwabenya (non-hotspot  
191 areas) were 4.43 ng/g lipid wt. and 0.03 ng/g lipid wt. respectively. They found that PCB-28  
192 contributed the highest of 29.5% of the total PCBs in the milk samples, and PCB-101 contributed  
193 the lowest of 1.74%. The estimated daily intake of PCBs and total PCBs concentrations in this  
194 work were found to be lower as compared to similar studies across the world. The estimated  
195 hazard quotient using Health Canada's guidelines threshold limit of 1 µg/kg bw/day showed no  
196 potential health risk to babies. However, considering minimum tolerable value of 0.03 µg/kg  
197 bw/day defined by the Agency for Toxic Substances and Disease Registry (ATSDR), the values  
198 of some mothers were found to be at the threshold limit. This may indicate a potential health risk  
199 to their babies. Mothers with values at the threshold levels of the minimum tolerable limits are  
200 those who work or reside in and around the Agbogbloshie e-waste site.

201  
202 Though several studies have determined PCBs in whole human milk, very few have examined  
203 the levels in the colostrum, transitional milk and mature milk simultaneously in the same study.  
204 To the best of our knowledge, no such study has been conducted in Ghana, West Africa, the  
205 whole of Africa and even in most part of the world. Apart from a Hungarian study (39) which  
206 determined PCBs and PCDDs in human milk during the three stages of lactation, studies of this  
207 kind are rare.

208 Breastfeeding mothers produce three different types of breast milk namely colostrum,  
209 transitional and mature milk during lactation. Based on these observations in the literature, we  
210 hypothesized that Ghana, which is rapidly becoming industrialized, motorized and urbanized,  
211 may be contaminated with high levels of OCPs. Therefore, we propose that these OCPs may



212 bioaccumulate to different extents in the three types of breast milk produced by the nursing  
213 mother at levels exceeding the permissible safety levels set by the WHO.

214 Notwithstanding the fact that PCBs are essentially industrial-based chemicals and the Volta  
215 Region is non-industrialized, nevertheless, the global movement of PCBs is such that they can be  
216 transported everywhere. The study therefore, aimed to find out which portion of human breast  
217 milk would accumulate PCBs the most and to explore whether mothers delivering at the Ho  
218 Teaching Hospital had accumulated unusually high levels of PCBs in any of the types of breast  
219 milk which could pose significant health risks to their infants.

220

## 221 **Materials and Methods**

### 222 **Study Design**

223 The study employed a cross-sectional design approach to collect data. Determination of PCBs  
224 formed part of a broader study conducted at the Ho Teaching Hospital to quantify levels of  
225 contaminants in human breast milk. The study recruited a total of forty-seven (47) participants  
226 using purposive sampling.

227

### 228 **Study settings**

229 The study was carried out at the Ho Teaching Hospital (HTH). The hospital was formerly known  
230 as the Volta Regional Hospital. The HTH was chosen as the study site because it has a wide  
231 public patronage. Besides its status as a teaching hospital, it also serves as a referral facility  
232 within the Volta Region. Below is the map of the study area (sampling site). **Figure 1** shows the  
233 sampling site.

234 *Figure 1: A map of sampling site showing residences of participants*

235

236 Though most of the study participant were residing in the Ho Municipality during  
237 the time of the study, some of them had previously lived in other regions of Ghana  
238 ranging from 2 to 16 years.

239

## 240 **Study Population**

241 The study recruited healthy lactating mothers aged 18 – 48 years who delivered at the Maternity  
242 Ward of the Ho Teaching Hospital during the time of the study; from December 25, 2020 to June  
243 30, 2021. All healthy mothers in the age bracket 18 – 48 years who gave birth at the Maternity  
244 Ward of the Ho Teaching Hospital and were willing to take part in the study were included.  
245 Exclusion criteria included mothers who satisfied the above criteria but gave birth to twins and  
246 those mothers who could not be followed to their homes to collect the transitional and mature  
247 milks were excluded.

248

## 249 **Sample size and Sampling Method**

250 The main sample investigated in the study was human breast milk. Though the estimated sample  
251 size was fifty (50) participants, the actual number of participants who willingly took part in the  
252 study was forty-seven (47/50); giving a success rate of sample collection of 94%.

253 Since we employed purposive sampling method, any mother who delivered at Maternity Ward  
254 during the time of the study and fell within the inclusion criteria and was willing to take part was  
255 selected. The process continued until we enrolled the 47 participants.

256 About fifteen millilitres each of colostrum, transitional milk and mature milk was collected from  
257 each participant during the different stages of lactation namely, from birth to day four  
258 (colostrum); from day five onwards up to 2 weeks (transitional milk) and from 2 weeks and  
259 beyond (mature milk). Arrangements were made with the midwife in charge of the Maternity  
260 Ward to facilitate collection of the samples. Colostrum milk was collected few hours after birth  
261 while the mother was in the hospital while transitional milk was collected during the one week  
262 postnatal discharge at the hospital. Thereafter, in cases where we did not get a participant to  
263 donate the mature milk at the facility, she was followed to her residence to do so. The process  
264 continued until we enrolled a total of forty-seven participants.

265 Besides the breast milk, each participant was made to complete a structured questionnaire to  
266 elicit information on biodata, geographical location and on dietary pattern. Since data were  
267 collected during the Covid -19 period, all Covid-19 prevention protocols were strictly adhered to  
268 during the sampling process.

269

## 270 **Ethical Considerations**

271 The protocol for the study was reviewed and approved by the University of Health and Allied  
272 Sciences Research Ethics Committee (UHAS-REC), Protocol Number UHAS-REC A.9 [6] 19-  
273 20. Besides, permission and clearance were sought for from the relevant hospital authorities and  
274 departments before the commencement of the study.

## 275 **Materials and Reagents for PCBs Analysis**

276 Mass Chromatograph (Agilent 7890B GC with Agilent Technologies GC Sampler 80), Mass  
277 Spectrometer (Agilent 7000C Triple Quadruple), Chromatographic grade ethyl acetate (pesticide  
278 grade, Merck), analytical grade acetonitrile, ACN, (99.8% from Sigma-Aldrich) sodium chloride

279 (99.99%; BDH), anhydrous magnesium sulphate ACS (RG, 98.00%), trisodium citrate dehydrate  
280 (99.00%, Thermo Scientific™), disodium hydrogen citrate sesquihydrate 99.00%, Thermo  
281 Scientific™), primary secondary amine, PSA, (Thermo Scientific™), formic acid, mixed PCBs  
282 standards obtained from Dr. Ehrenstorfer (GmbH, Augsburg, Germany). All the equipment  
283 including balances and pipettes were all calibrated to ensure accuracy.

284

### 285 **Sample Preparation for the Determination of PCBs from Breast Milk Samples**

286 A modified version of QuEChERS was employed to extract PCBs from the breast milk samples.  
287 Approximately 10.00 g ( $\pm 0.05$  g) of each sample of colostrum, transitional milk and mature milk  
288 was weighed into a 50.0 mL centrifuge tube, after which 10.0 mL acetonitrile (ACN) was added  
289 and then vortexed for one minute. Thereafter, a mixture of  $4.00 \text{ g} \pm 0.20$  g anhydrous magnesium  
290 sulphate,  $1.00 \text{ g} \pm 0.05$  g sodium chloride,  $1.00 \text{ g} \pm 0.05$  g trisodium citrate dihydrate and  $0.50 \text{ g}$   
291  $\pm 0.03$  g disodium hydrogen citrate sesquihydrate were added and vortexed for 1 minute and then  
292 centrifuged at 4000 rpm for 5 minutes. This was followed by dispersive solid phase extraction  
293 (DSPE). 6.0 mL aliquots of the ACN layer was then transferred into a 15.0 mL centrifuge which  
294 contained 150.0 mg primary secondary amine (PSA), 150.0 mg C18 and 900.0 mg  $\text{MgSO}_4$ . The  
295 tube was closed and shaken vigorously for 30 seconds and centrifuged at 4000 rpm for 5  
296 minutes. 4.0 mL of the cleaned extract was then transferred into a round bottomed flask and  
297 adjusted to about pH of 5 quickly by adding 40.0  $\mu\text{L}$  of 5% formic acid solution in acetonitrile  
298 (v/v) and the filtrate concentrated below 40 °C on a rotary evaporator just to dryness. It was then  
299 re-dissolved in ethyl acetate by adding 1.0 mL using a pipette. The extract was transferred into a  
300 2.0 mL standard opening vial for quantitation by a gas chromatograph (Agilent 7890B GC with

301 Agilent Technologies GC Sampler 80 /MS (Agilent 7000 C Triple Quadruple). The extract was  
302 stored frozen until quantitation was achieved.

303

## 304 **Analytical Procedures for Determining PCBs from Human Breast Milk** 305 **Samples**

306 Analysis of PCBs from human breast milk samples was done using GC–MS/MS (Agilent 7890 B  
307 GC with Agilent Technologies GC Sampler 80 /MS (Agilent 7000 C Triple Quadruple).

308

## 309 **Quality Assurance Protocol**

### 310 **Laboratory Reagent Blank**

311 One laboratory reagent blank (made up of all chemicals except the sample) for each set of  
312 extracts were also run. The reagents were treated the same way as the samples, including  
313 exposure to all glassware and equipment that were used. The LRB were used to ascertain if  
314 method analytes or other interferences were present in the laboratory environment, the reagents  
315 or apparatus.

316

### 317 **Calibration Standards for PCB Congeners**

318 Before analysing, the device was calibrated with a standard solution containing a combination  
319 of PCB congeners. The calibration standard solutions were purchased pre-packaged. Calibration  
320 was performed at seven (7) sites. Calibration standard solutions containing 5 ppb, 10 ppb, 20  
321 ppb, 50 ppb, 100 ppb, 200 ppb, and 500 ppb mixed PCBs standards were used to calibrate the  
322 instrument in order to determine the detector's linear response. The calibration point also include

323 the LOQ. Table 1 summarises the GC - MS/MS operating settings for the study of PCB  
324 congeners.

325

326 **Table 1: Summary of GC Operating Conditions for the Determination of**  
327 **PCBs**

---

**Apparatus:**

| <b>Instrument</b> | <b>Description</b>                                                                                                               |
|-------------------|----------------------------------------------------------------------------------------------------------------------------------|
| Gas Chromatograph | Agilent 7890 B GC with a Agilent Technologies GC sampler 80                                                                      |
| Analytical column | 30m +10m EZ Guard x 0.25mm internal diameter fused silica capillary coated with VF-5ms (0.25µm film) from Agilent or equivalent. |
| Liner             | Agilent 5190 -3167:900UL Single Tapered                                                                                          |
| Mass Spectrometer | Agilent 7000C Triple Quadrupole                                                                                                  |

**Temperatures:**

| <b>Item</b>       | <b>Conditions</b>                                                                        |
|-------------------|------------------------------------------------------------------------------------------|
| Injector          | Splitless mode, temperature 280°C                                                        |
| Oven              | 70°C / 2min <u>25°C/min</u> 150°C <u>3°C/min</u> 200°C <u>8°C/min</u><br>280°C/13.133min |
| MSD Transfer Line | 325°C                                                                                    |

**Gases:**

| <b>Gas</b>                  | <b>Flow rate</b>          |
|-----------------------------|---------------------------|
| Helium (carrier)            | 2.25 ml/min constant flow |
| Collision gas<br>(Nitrogen) | 1.5 ml/min constant flow  |
| Septum purge                | 30mL/min at 0.75min       |
| Pressure                    | 27.5psi                   |

**Mass Spectrometry**

|                    |          |
|--------------------|----------|
| Segment start time | 4.0 min  |
| Segment end time   | 45.0 min |
| Source Temperature | 300°C    |
| Scan Mode          | MRM      |
| Ionization mode    | EI       |

---

328

329 After establishing the GC operating parameters, the same settings were utilised to analyse the  
330 standards, quality control check samples, laboratory reagent blanks, and breast milk sample  
331 extracts.

332

### 333 **Performance Validation and Reproducibility**

334 For the purpose of validating the method of extraction to identify matrix effects and determine  
335 the recovery of analytes or selectivity of the method, some samples were spiked with known  
336 concentrations of mixed PCBs standard and analysed to determine their recovery. The recovery  
337 studies of the PCB congeners ranged from 16% - 112%. Generally, higher PCB congeners gave  
338 very poor yields (PCB 209, PCB 194, PCB 180, PCB 170 and PCB 138 respectively) while the  
339 lower congeners like PCB 18, PCB 28, PCB 31, PCB 44 and PCB 153 gave higher yields for the  
340 recovery studies. Notwithstanding, the recoveries for the quality control samples were all good.

341 **Table 2** summarises the recoveries of the spiked breast milk samples and quality control protocol  
342 standards.

343

344

345

346

347

348

349

350

351

**Table 2: Performance of the GC-MS/MS Method for PCBs Analysis in Breast Milk**

| PCB<br>Congener | Retention<br>Time/min | LOD/<br>ppb | LOQ/<br>ppb | 50 ppb<br>Spiked | Recovery (%) of QCs |    |     |     |
|-----------------|-----------------------|-------------|-------------|------------------|---------------------|----|-----|-----|
|                 |                       |             |             |                  | 20                  | 50 | 100 | 200 |

|     |        |        |      |     | ppb | ppb | ppb | ppb   |
|-----|--------|--------|------|-----|-----|-----|-----|-------|
| 18  | 11.853 | 0.0033 | 0.01 | 112 | 90  | 108 | 93  | 101.5 |
| 28  | 14.007 | 0.0033 | 0.01 | 96  | 95  | 100 | 106 | 94.5  |
| 31  | 19.885 | 0.0033 | 0.01 | 60  | 100 | 100 | 96  | 101.0 |
| 44  | 16.400 | 0.0033 | 0.01 | 84  | 75  | 100 | 96  | 109.0 |
| 52  | 15.495 | 0.0033 | 0.01 | 82  | 85  | 100 | 98  | 106.0 |
| 101 | 23.329 | 0.0033 | 0.01 | 80  | 85  | 102 | 104 | 99.0  |
| 118 | 23.329 | 0.0033 | 0.01 | 76  | 110 | 98  | 95  | 101.5 |
| 138 | 25.165 | 0.0033 | 0.01 | 56  | 95  | 102 | 94  | 102.0 |
| 149 | 23.937 | 0.0033 | 0.01 | 62  | 95  | 98  | 101 | 100.0 |
| 153 | 24.144 | 0.0033 | 0.01 | 58  | 90  | 102 | 96  | 101.0 |
| 170 | 27.420 | 0.0033 | 0.01 | 40  | 100 | 102 | 94  | 100.0 |
| 180 | 28.248 | 0.0033 | 0.01 | 32  | 80  | 100 | 95  | 106.5 |
| 194 | 29.979 | 0.0033 | 0.01 | 26  | 100 | 102 | 93  | 109.5 |
| 209 | 31.490 | 0.0033 | 0.01 | 16  | 75  | 102 | 94  | 101.5 |

352

353

### 354 Calculation of Recoveries

355 Percentage recoveries of the spiked samples were calculated using the following  
356 formula:

357 **Recovery (%R)** =  $\frac{C_{spiked} - C_{Non-spiked}}{C_{Added}} \times 100\%$  .....(Equ. 1), where

358  $C_s$  = Concentration of spiked sample aliquot

359  $C_{Uspiked}$  = Concentration of unspiked sample aliquot

360  $C_{Added}$  = Spiked Diluent concentration.

361

### 362 The 14 PCB Congeners and their IUPAC names

363 **PCB Congener IUPAC Systematic Name**

364 PCB 18 2,2',5 - trichlorobiphenyl

365 PCB 28 2,4,4'- trichlorobiphenyl



|     |         |                                               |
|-----|---------|-----------------------------------------------|
| 366 | PCB 31  | 2,4',5 - trichlorobiphenyl                    |
| 367 | PCB 44  | 2,2',4,4' - tetrachlorobiphenyl               |
| 368 | PCB 52  | 2,2',5,5' - tetrachlorobiphenyl               |
| 369 | PCB 101 | 2,2',4,5,5' - pentachlorobiphenyl             |
| 370 | PCB 118 | 2,3',4,4',5 – pentachlorobiphenyl             |
| 371 | PCB 138 | 2,2',3,4,4',5' - hexachlorobiphenyl           |
| 372 | PCB 149 | 2,2',3,4',5',6 - hexachlorobiphenyl           |
| 373 | PCB 153 | 2,2',4,4',5,5' - hexachlorobiphenyl           |
| 374 | PCB 170 | 2,2',3,3',4,4',5 - heptachlorobiphenyl        |
| 375 | PCB 180 | 2,2',3,4,4',5,5' - heptachlorobiphenyl        |
| 376 | PCB 194 | 2,2',3,3',4,4',5,5' - octachlorobiphenyl      |
| 377 | PCB 209 | 2,2',3,3',4,4',5,5',6,6' - decachlorobiphenyl |

378

### 379 **Retention Time Windows**

380 Retention time windows are critical for identifying target molecules. Absolute retention periods  
381 were used in addition to relative retention times to determine PCBs as congeners using the  
382 internal standard technique. To compensate for modest variations in absolute retention periods  
383 caused by sample loadings and typical chromatographic variability, retention time frames were  
384 created. The width of the retention time window was carefully chosen to reduce the possibility of  
385 both false positive and false negative outcomes.

386

### 387 **Quantitative Identification of PCB Congeners and Quantitation**

388 The identification of PCBs as congeners using the GC - MS/MS method is achieved by matching  
389 mass to charge ratio between precursor and product ions of the known standards against the  
390 unknown sample and the use of retention time is also When a peak from a sample extract falls  
391 exactly within the retention time range established by a certain analyte of interest, this is referred  
392 to as tentative identification.

393

## 394 **Results**

395 The results of the study are hereby presented and discussed. Forty-seven (47) fresh breastfeeding  
396 mothers were recruited for the study, representing 94% participation. The sociodemographic  
397 profile of the mothers is presented in Table 3.

398

399 **Table 3: Sociodemographic Profile of Participants and their Babies**

| <b>Maternal characteristics</b> | <b>Variables</b> | <b>Frequency (n - 47)</b> | <b>Mean</b> | <b>Percentage (%)</b> |
|---------------------------------|------------------|---------------------------|-------------|-----------------------|
| <b>Maternal Education</b>       | None             | 2                         |             | 4.3                   |
|                                 | JHS              | 11                        |             | 23.4                  |
|                                 | SHS/Secondary    | 11                        |             | 23.4                  |
|                                 | Vocational       | 1                         |             | 2.1                   |
|                                 | Tertiary         | 22                        |             | 46.8                  |
| <b>Maternal Age (Yrs)</b>       | 11 Up to 20      | 1                         |             | 2.1                   |
|                                 | 21 – 30          | 19                        | 31.28       | 40.4                  |
|                                 | 31 – 40          | 24                        |             | 51.1                  |
|                                 | 41 – 50          | 3                         |             | 6.4                   |
| <b>Body Mass (kg)</b>           | 40 -59           | 4                         |             | 8.5                   |
|                                 | 60 – 79          | 24                        |             | 51.1                  |
|                                 | 80 -99           | 17                        | 77.97       | 36.2                  |
|                                 | 100 – 119        | 2                         |             | 4.3                   |
| <b>Height (cm)</b>              | 131 – 140        | 1                         |             | 2.1                   |

|                               |                      |    |        |       |
|-------------------------------|----------------------|----|--------|-------|
|                               | 141 – 150            | 4  |        | 8.5   |
|                               | 151 – 160            | 12 | 160.19 | 25.5  |
|                               | 161 – 170            | 27 |        | 57.4  |
|                               | 171 – 180            | 3  |        | 6.4   |
| <b>BM1 (kg/m<sup>2</sup>)</b> | 18.0 - 24.9          | 5  |        | 10.6  |
|                               | 25.0 - 29.9          | 18 |        | 38.3  |
|                               | 30.0 - 34.9          | 16 | 30.63  | 34.04 |
|                               | 35.0 - 39.9          | 5  |        | 10.6  |
|                               | 40.0 - 44.9          | 3  |        | 6.4   |
| <b>Parity</b>                 | Primiparous          | 8  |        | 17    |
|                               | Multiparous          | 39 |        | 83    |
| <b>Occupation</b>             | Civil servant        | 15 |        | 31.9  |
|                               | Teacher              | 5  |        | 10.6  |
|                               | Trader               | 15 |        | 31.9  |
|                               | Student              | 2  |        | 4.3   |
|                               | Other                | 10 |        | 21.3  |
| <b>Work Tools</b>             | Metals               | 2  |        | 4.3   |
|                               | Electrical equipment | 30 |        | 63.8  |
|                               | Printers             | 11 |        | 23.4  |
|                               | Others               | 4  |        | 8.5   |
| <b>Current Residence</b>      | Ho Municipality      | 44 |        | 93.6  |
|                               | Hohoe                | 2  |        | 4.3   |
|                               | Have                 | 1  |        | 2.1   |
| <b>Common Diet</b>            | Sea food             | 5  |        | 10.6  |
|                               | Fresh water          | 4  |        | 8.5   |
|                               | Both                 | 38 |        | 80.9  |
| <b>Water Source</b>           | Well                 | 2  |        | 4.3   |
|                               | Tap water            | 39 |        | 83    |
|                               | Other                | 6  |        | 12.8  |
| <b>Infant Sex</b>             | Male                 | 26 |        | 55.3  |

Female 21 44.7

---

400  
401 The mean age of the mothers recruited for the study was  $31.19 \pm 5.48$  years, with the minimum  
402 and maximum ages being 21 and 44 years respectively. Their average BMI was  $30.63 \pm 5.03$   
403  $\text{kgm}^{-2}$ . Of the forty-seven mothers recruited, 10.6% (5/47) had normal weight, 38.3% (18/47)  
404 were overweight while 51.0% (24/47) were obese. Most of the mothers were multiparous  
405 39(83%) while the rest, 8(17%) were primiparous or first-time mothers.

406  
407 **Levels of PCBs in Human Breast Milk**

408 Forty-seven (47) triplicate breast milk samples made up of colostrum, transitional milk and  
409 mature milk from each participant, making up a total of 141 breast milk samples were analysed  
410 to determine the concentrations of 14 PCB congeners. Result of the analysis carried out on all the  
411 samples showed that all the PCB congeners were below limits of detection. The LODs and LOQs  
412 for the PCBs were 0.01 ppb and 0.03 ppb respectively. Since the PCBs levels in all in the  
413 portions of breast milk were below the threshold of detection, the background data of respondent  
414 were not subjected to statistical analysis.

415  
416 **Discussion**

417 The non-detection of PCBs in the breast milk samples analysed could be considered a positive  
418 development. The results of the study were probably an indication of the fact that the mothers in  
419 the study had low very low levels of exposure to PCBs. This could be explained by the fact that  
420 PCBs are essentially industrial-based chemicals and there are virtually no industries situated in  
421 Ho to cause the mothers to be exposed to these chemicals, even though PCBs as a member of  
422 POPs do not respect international boundaries (40,41). It could also mean that the campaign

423 initiated by the Stockholm Convention on elimination of PCBs in the environment is yielding  
424 positive results. However, the non- detection should not be interpreted as a total absence of the  
425 PCBs in the mothers, and for that matter, in the environment. It may probably mean that some of  
426 the PCBs were present in the breast milk but their concentrations were not high enough to trigger  
427 or cause any significant health risks in the nursing infants. The ingestion of PCBs is of high  
428 toxicological relevance due to their long-term health effects. There is, therefore, the need for  
429 environmental samples to be analysed to understand the general pattern of distribution of PCBs  
430 in the area under consideration. While not dwelling much on their acute toxicity, research  
431 indicates that low levels of exposure to some PCBs may lead to possible endocrine disruption in  
432 humans (42), a situation which led to a ban on use of many PCBs for industrial and commercial  
433 purposes.

434  
435 The study results were in line with a study conducted in Brazil (43) where they detected no  
436 contamination of human breast milk with PCBs in Rio Blanco/AC.

437 The study results were, however, in sharp contrast to those reported in Accra, Ghana by (38) who  
438 assessed the levels of PCBs in the breast milk of some Ghanaian women at suspected hotspot  
439 (Agbogbloshie) and relatively non-hotspot (Kwabenya) areas to ascertain if the levels of PCBs in  
440 mothers milk posed any health risk to the breastfed infants. A total of 128 individual human  
441 breast milk were sampled from both primiparae and multiparae (Agbogbloshie – 105 and  
442 Kwabenya – 23) and the samples were analyzed using GC – MS/MS. The total mean levels and  
443 range of  $\Sigma 7$ PCBs were 3.64 ng/g lipid wt. and <LOD–29.20 ng/g lipid wt. respectively. Mean  
444 concentrations from Agbogbloshie (hot-spot area) and Kwabenya (non-hotspot areas) were 4.43  
445 ng/g lipid wt. and 0.03 ng/g lipid wt. respectively. The present study site was, however, not

446 regarded as a ‘hot-spot’ area for PCBs. Moreover, it is important to understand that the samples  
447 examined in the current were different from the ones employed in those studies.

448  
449 It is important to recognize that the public health significance of PCBs contamination in human  
450 populations and the concomitant effects on breast-fed infants cannot be overemphasised. Some  
451 researchers have reported a decline in the levels of some POPs in human milk in recent times  
452 (44) which is a positive development in view of the negative effects of POPs on human  
453 population. Per the requirements of the Stockholm .Convention on POPs, levels of certain POPs  
454 in human breast milk would serve as an indication of the effectiveness of the treaty in  
455 eliminating or reducing emissions of selected POPs.

456  
457 Even though the study results showed non detection of PCBs in human breast during three  
458 lactational stages, however, monitoring of PCBs in human breast milk is still important and  
459 should be encouraged. It is therefore, appropriate and relevant to inform and educate the general  
460 public about the harmful effects of such chemicals, and more importantly, the need of the  
461 government to ban or place restrictions on their use. This study will contribute significantly to  
462 efforts toward providing relevant data on current levels of PCBs in Ghana.

463  
464 **Conclusion**  
465 The levels of polychlorinated biphenyls in the three portions of mothers’ milk examined at the  
466 Ho Teaching Hospital during lactation were all below detection limits. Thus the null hypothesis  
467 was upheld with regard to the distribution of PCBs in colostrum, transitional milk and mature.

468 Consequently, we concluded that the levels of PCBs in mothers' milk were not high enough to  
469 pose any significant health risks to breastfeeding infants.

470 It is, however, recommended that environmental samples should be analysed to understand the  
471 distribution of PCBs in the area or region. Moreover, further studies should be carried out on  
472 human breast milk samples in other hospitals in the region to determine levels of PCBs during  
473 lactational stages.

474 Since prevention is always better than cure, there is the need for public education on the adverse  
475 health effects of PCBs to children and humans in general and how to protect the general  
476 population from being exposed to them in the environment that might lead to undesirable health  
477 consequences, especially, in breastfed infants..

478

#### 479 **Declaration of Interest**

480 The authors collectively have no conflict of interest to declare.

481

#### 482 **Authors' Contributions**

483 Conceptualization: JWAJ, DEKK, DKE, JKB, JT, HM; Investigation – JWAJ, DEKK, DKE,  
484 JKB, JT, HM; Funding acquisition – JWAJ, DKE, DEKK; Methodology – JWAJ, FOK, DEKK,  
485 JT & HM; Data analysis – JWAJ, DKE, JKB, DEKK; FOK; Resources – JWAJ; Writing and  
486 Editing – JWAJ, DKE, DEKK, JKB, FOK, HM; Project Administration - JWAJ

487

#### 488 **Funding**

489 This work was partly funded by University of Health and Allied Sciences Research Fund  
490 (UHAS-RF; UHAS-RF/IL-006/20–21) and UHAS Faculty Development Grant (UHAS FDG;  
491 ganoch) and Ghana Standards Authority (GSA) by a discount of 75% on every sample analysed.

492

### 493 **Informed Consent Statement**

494 Written informed consent was obtained from all participants who took part in the study.

495

### 496 **Acknowledgement**

497 We sincerely thank University of Health and Allied Sciences Research Fund and Ghana  
498 Standards Authority for funding this project. We are also grateful to the staff of Ho Teaching  
499 Hospital, especially, the Health Information Officer, Mr. Benjamin Amedume, and staff of the  
500 Ethics Department for their cooperation and support during the project. Finally, we wish to thank  
501 Ms. Norkplim Dei Hlorlewu and Mrs. Guide Mensah (midwives) sincerely for sacrificing so  
502 much in the collection of the breast milk samples, in spite of the challenges they faced.

503

504

505

506

507

508

509

510



511

## 512 **References**

- 513 1. Binns C, Lee M, Low WY. The Long-Term Public Health Benefits of Breastfeeding.  
514 Asia-Pacific J Public Heal. 2016;28(1):7–14.
- 515 2. W.H.O. Exclusive breastfeeding for six months best for babies everywhere [Internet]. 5th  
516 January statement. 2011. Available from:  
517 [http://www.who.int/mediacentre/news/statements/2011/breastfeeding\\_20110115/en/](http://www.who.int/mediacentre/news/statements/2011/breastfeeding_20110115/en/)
- 518 3. Landrigan PJ, Sonawane B, Mattison D, Mccally M, Garg A. Chemical Contaminants in  
519 Breast Milk and Their Impacts on Children ’ s Health : An Overview Mini-Monograph.  
520 2002;110(6):313–5.
- 521 4. Mead MN. Contaminants in human milk: Weighing the risks against the benefits of  
522 breastfeeding. Environ Health Perspect [Internet]. 2008;116(10):A426–34. Available  
523 from: [http://www.scopus.com/inward/record.url?eid=2-s2.0-  
524 55949129821&partnerID=40&md5=5977c4633d4738043f242c50bfb6e58b](http://www.scopus.com/inward/record.url?eid=2-s2.0-55949129821&partnerID=40&md5=5977c4633d4738043f242c50bfb6e58b)
- 525 5. WHO. Persistent Organic Pollutants ( POPs ): Children ’ s Health and the Environment  
526 [Internet]. 2008. Available from: <https://apps.who.int/iris/rest/bitstreams/1318080/retrieve>
- 527 6. NOAA. What are PCBs ? [Internet]. National Oceanic and Atmospheric Administration.  
528 2023. p. 1–2. Available from: <https://oceanservice.noaa.gov/facts/pcbs.html>
- 529 7. ATSDR-CDC. PCBs: Chemical and Physical Information [Internet]. 1977. Available  
530 from: <https://www.atsdr.cdc.gov/toxprofiles/tp17-c4.pdf>
- 531 8. Afghan BK, Chau ASY. Analysis of Trace Organics in the Aquatic Environment. In: Boca

- 532 Raton, FL; CRC Press inc; 33 - 68. 1989.
- 533 9. WHO. POLYCHLORINATED BIPHENYLS : HUMAN HEALTH ASPECTS [Internet].  
534 2003. Available from: <https://incem.org/documents/cicads/cicads/cicad55.htm#9.0>
- 535 10. ATSDR. ATSDR Case Studies in Environmental Medicine Polychlorinated Biphenyls  
536 (PCBs) Toxicity [Internet]. 2018. Available from:  
537 <https://www.atsdr.cdc.gov/csem/pcb/docs/pcb.pdf>
- 538 11. Schell LM, Gallo M V., Denham M, Ravenscroft J. Effects of pollution on human growth  
539 and development: An introduction. *J Physiol Anthropol*. 2006;25(1):103–12.
- 540 12. Schell LM, Gallo M V., Denham M, Ravenscroft J, DeCaprio AP, Carpenter DO.  
541 Relationship of thyroid hormone levels to levels of polychlorinated biphenyls, lead, p,p'-  
542 DDE, and other toxicants in Akwesasne Mohawk Youth. *Environ Health Perspect*  
543 [Internet]. 2008;116(6):806–13. Available from:  
544 [https://ehp.niehs.nih.gov/doi/full/10.1289/ehp.10490?url\\_ver=Z39.88-  
545 2003&rfr\\_id=ori:rid:crossref.org&rfr\\_dat=cr\\_pub\\_0pubmed](https://ehp.niehs.nih.gov/doi/full/10.1289/ehp.10490?url_ver=Z39.88-2003&rfr_id=ori:rid:crossref.org&rfr_dat=cr_pub_0pubmed)
- 546 13. DeCaprio AP, Johnson GW, Tarbell AM, Carpenter DO, Chiarenzelli JR, Morse GS, et al.  
547 Polychlorinated biphenyl (PCB) exposure assessment by multivariate statistical analysis  
548 of serum congener profiles in an adult Native American population. *Environ Res*.  
549 2005;98(3):284–302.
- 550 14. Johnson BL, Hicks HE, De Rosa CT. Key environmental human health issues in the Great  
551 Lakes and St. Lawrence River basins. *Environ Res* [Internet]. 1999;80(2 II):S2. Available  
552 from: <https://www.sciencedirect.com/science/article/abs/pii/S001393519893938X>

- 553 15. Johnson-Restrepo B, Kannan K, Rapaport DP, Rodan BD. Polybrominated diphenyl  
554 ethers and polychlorinated biphenyls in human breast adipose samples from Brazil.  
555 *Environ Sci Toxicol*. 2005;39(14):5117–82.
- 556 16. Weisglas-Kuperus N, Patandin S, Berbers GAM, Sas TCJ, Mulder PGH, Sauer PJJ, et al.  
557 Immunologic effects of background exposure to polychlorinated biphenyls and dioxins in  
558 Dutch preschool children. *Environ Health Perspect*. 2000;108(12):1203–7.
- 559 17. Kimbrough RD, Krouskas CA. Human Exposure to Polychlorinated Biphenyls A Critical  
560 Synopsis. *Toxicol Rev [Internet]*. 2003;22(4):217–33. Available from:  
561 <https://pubmed.ncbi.nlm.nih.gov/15189045/>
- 562 18. Carpenter DO. Polychlorinated Biphenyls ( PCBs ): Routes of Exposure and Effects on  
563 Human Health. *Rev Environ [Internet]*. 2006;21(1):1–24. Available from:  
564 [https://pubmed.ncbi.nlm.nih.gov/16700427/#:~:text=Exposure to PCBs suppresses  
565 the,effects of other carcinogenic substances.](https://pubmed.ncbi.nlm.nih.gov/16700427/#:~:text=Exposure to PCBs suppresses the,effects of other carcinogenic substances.)
- 566 19. Guo YL, Lambert GH, Hsu C. Growth Abnormalities in the Population Exposed in Utero  
567 and Early Postnatally to Polychlorinated Biphenyls and Dibenzofurans. *Environ Health  
568 Perspect [Internet]*. 1995;103(16):117–22. Available from:  
569 <http://dx.doi.org/10.1289/ehp.95103s6117>
- 570 20. Lai TJ, Guo YL, Guo NW, Hsu CC. Effect of prenatal exposure to polychlorinated  
571 biphenyls on cognitive development in children : a longitudinal study inT aiwan. *Br J  
572 Psychiatry [Internet]*. 2001;178(40):49s – 52. Available from:  
573 [https://www.researchgate.net/publication/12020071\\_Effect\\_of\\_prenatal\\_exposure\\_to\\_pol  
574 ychlorinated\\_biphenyls\\_on\\_cognitive\\_development\\_in\\_children\\_A\\_longitudinal\\_study\\_in](https://www.researchgate.net/publication/12020071_Effect_of_prenatal_exposure_to_polychlorinated_biphenyls_on_cognitive_development_in_children_A_longitudinal_study_in)

575        \_Taiwan

- 576    21.    Yamashita F, Hayashi M. Fetal PCB Syndrome : Clinical Features , Intrauterine Growth  
577        Retardation and Possible Alteration in Calcium Metabolism. Environ Health Perspect  
578        [Internet]. 1985;59:41–5. Available from: <https://pubmed.ncbi.nlm.nih.gov/3921362/>
- 579    22.    WHO. Persistent Organic Pollutants ( POPs ): Children ’ s Health and the Environment.  
580        2008.
- 581    23.    Gladen BC, Taylor JS, Wu Y, Ragan NB, Rogan WJ, Hsuf C. Dermatological findings in  
582        children exposed transplacentally to heat-degraded polychlorinated biphenyls in Taiwan.  
583        Br J Dermatol. 1990;122(6):799–808.
- 584    24.    Guo YL, Chen Y-C, Yu M-L, Shu C-C. Early Development of Yu-Cheng Children Born  
585        Seven to Twelve Years after the Taiwan PCB Outbreak. Chemosphere. 1994;29(9–  
586        11):2395–404.
- 587    25.    Yen YY, Lan SJ, Ko YC, Chen CJ. Follow-up Study of Reproductive Hazards of  
588        Multiparous Women Consuming PCBs-Contaminated Rice Oil in Taiwan. Bull Environ  
589        Contam Toxicol USA. 2000;43(5):647–55.
- 590    26.    UNEP. Polychlorinated biphenyls ( PCBs ) [Internet]. 1995. Available from:  
591        <http://www.popstoolkit.com/about/chemical/pcbs.aspx>
- 592    27.    Massart F, Harrell JC, Federico G, Saggese G. Human Breast Milk and Xenoestrogen  
593        Exposure : A Possible Impact on Human Health. J Perinatol. 2005;25:282–8.
- 594    28.    Noren K, Meironyt D. Certain organochlorine and organobromine contaminants in  
595        Swedish human milk in perspective of past 20 - 30 years. Chemosphere.

- 596 2000;40(2000):1111–23.
- 597 29. Polder A, Gabrielsen GW, Odland JØ, Savinova TN, Tkachev A, Løken KB, et al. Spatial  
598 and temporal changes of chlorinated pesticides , PCBs , dioxins ( PCDDs / PCDFs ) and  
599 brominated flame retardants in human breast milk from Northern Russia. *Sci Total*  
600 *Environ.* 2008;391(1):41–54.
- 601 30. Dewailly E, Ayotte P, Bruneau S, Laliberte C, Muir DCG, Norstrom RJ. Inuit Exposure to  
602 Organochlorines through the Aquatic Food Chain in Arctic Quebec. *Environ Health*  
603 *Perspect.* 1993;101(7):618–20.
- 604 31. Cerná M, Krsková A, Cejchanová M. *International Journal of Hygiene and Human*  
605 *biomonitoring in the Czech Republic : An overview evá*. 2012;215:109–19.
- 606 32. Wilhelm M, Ewers U, Marczynski B, Ranft U. Human biomonitoring studies in North  
607 Rhine-Westphalia , Germany. *Int J Hyg Environ Health.* 2007;210:307–18.
- 608 33. Longnecker MP, Rogan WJ, Lucier G. The Human Health Effects of DDT (   
609 Dichlorodiphenyl- Trichloroethane) and PCBS ( Polychlorinated Biphenyls) and an  
610 Overview of Organochlorines in Public Health. *Annu Rev Public Heal.* 1997;18:211–44.
- 611 34. Patandin S, Dagnelie PC, Mulder PGH, Coul E Op De, Van JE, Veen D, et al. Dietary  
612 Exposure to Polychlorinated Biphenyls and Dioxins from Infancy until Adulthood : A  
613 Comparison between Breast-feeding , Toddler , and Long- term Exposure. *Environ Health*  
614 *Perspect.* 1999;107(1):45–51.
- 615 35. Albers JMCL, Kreis IA, Liem AKD, Zoonen E Van. Factors that Influence the Level of  
616 Contamination of Human Milk with Poly-chlorinated Organic Compounds. *Arch Environ*

- 617 Contam Toxicol. 1996;30:285–91.
- 618 36. Theelen RMC, Liem AKD, Van Wijnen JH. Intake of 2,3,7,8 Chlorine Substituted  
619 Dioxins, Furans, and Planar PCBs from Food in the Netherlands: Median and  
620 Distribution. *Chemosphere*. 1993;27(9):1625–35.
- 621 37. Falk C, Hanrahan L, Anderson HA, Kanarek MS, Draheim L, Needham L. Body Burden  
622 Levels of Dioxin , Furans , and PCBs among Frequent Consumers of Great Lakes Sport  
623 Fish 1. *Environ Res*. 1999;80(2):19–25.
- 624 38. Asamoah A, Essumang KD, Muff J, Kucheryavskiy S V, Sogaard EG. Assessment of  
625 PCBs and exposure risk to infants in breast milk of primiparae and multiparae mothers in  
626 an electronic waste hot spot and non-hot spot areas in Ghana. *Sci Total Environ*.  
627 2018;612:1473–9.
- 628 39. Vigh É, Colombo A, Benfenati E, Håkansson H, Berglund M, Bódis J, et al. Science of  
629 the Total Environment Individual breast milk consumption and exposure to PCBs and  
630 PCDD / Fs in Hungarian infants : A time-course analysis of the fi rst three months of  
631 lactation. *Sci Total Environ* [Internet]. 2013;449:336–44. Available from:  
632 <http://dx.doi.org/10.1016/j.scitotenv.2013.01.024>
- 633 40. Beyer A, Biziuk M. Fig. 1 Structure of polychlorinated biphenyls (PCBs). *Rev Environ*  
634 *Contam Toxicol*. 2009;201:137–58.
- 635 41. UN Environment Programme. PCB - A Forgotten Legacy? [Internet]. United Nations  
636 Environment Programme. 2017. Available from:  
637 [30](http://web.unep.org/chemicalsandwaste/what-we-do/science-and-knowledge/persistent-</a></p></div><div data-bbox=)

638 organic-pollutants-pops/pcb-forgotten-legacy

639 42. El-saeid MH, Hassanin AS, Bazeyad AY. Levels of Pesticide Residues in Breast Milk and  
640 the Associated Risk Assessment. Saudi J Biol Sci [Internet]. 2021;28(7):3741–4.

641 Available from: <https://doi.org/10.1016/j.sjbs.2021.04.062>

642 43. Kowalski CH, Costa JG, Godoya HT, Augustoc F. Determination of Polychlorinated  
643 Biphenyls in Brazilian Breast Milk Samples using Solid-Phase Microextraction and Gas  
644 Chromatography-Electron Capture Detection. J Braz Chem Soc. 2010;21(3):502–9.

645 44. Guerranti C, Palmieri M, Mariottini M, Focardi SE. Persistent Organic Pollutants in  
646 Human Milk from Central Italy: Levels and Time Trends. ISRN Toxicol. 2011;2011:1–6.

647

648

649

650

651

652

653

654

655

656

657

658 **Figure caption**

659 Figure 1: A map of sampling site showing residences of participants

660

661

662 **Supplementary materials captions**

663 S1 Appendix: Questionnaire for potential breast milk donors

664 S2 Appendix: Informed consent form

665



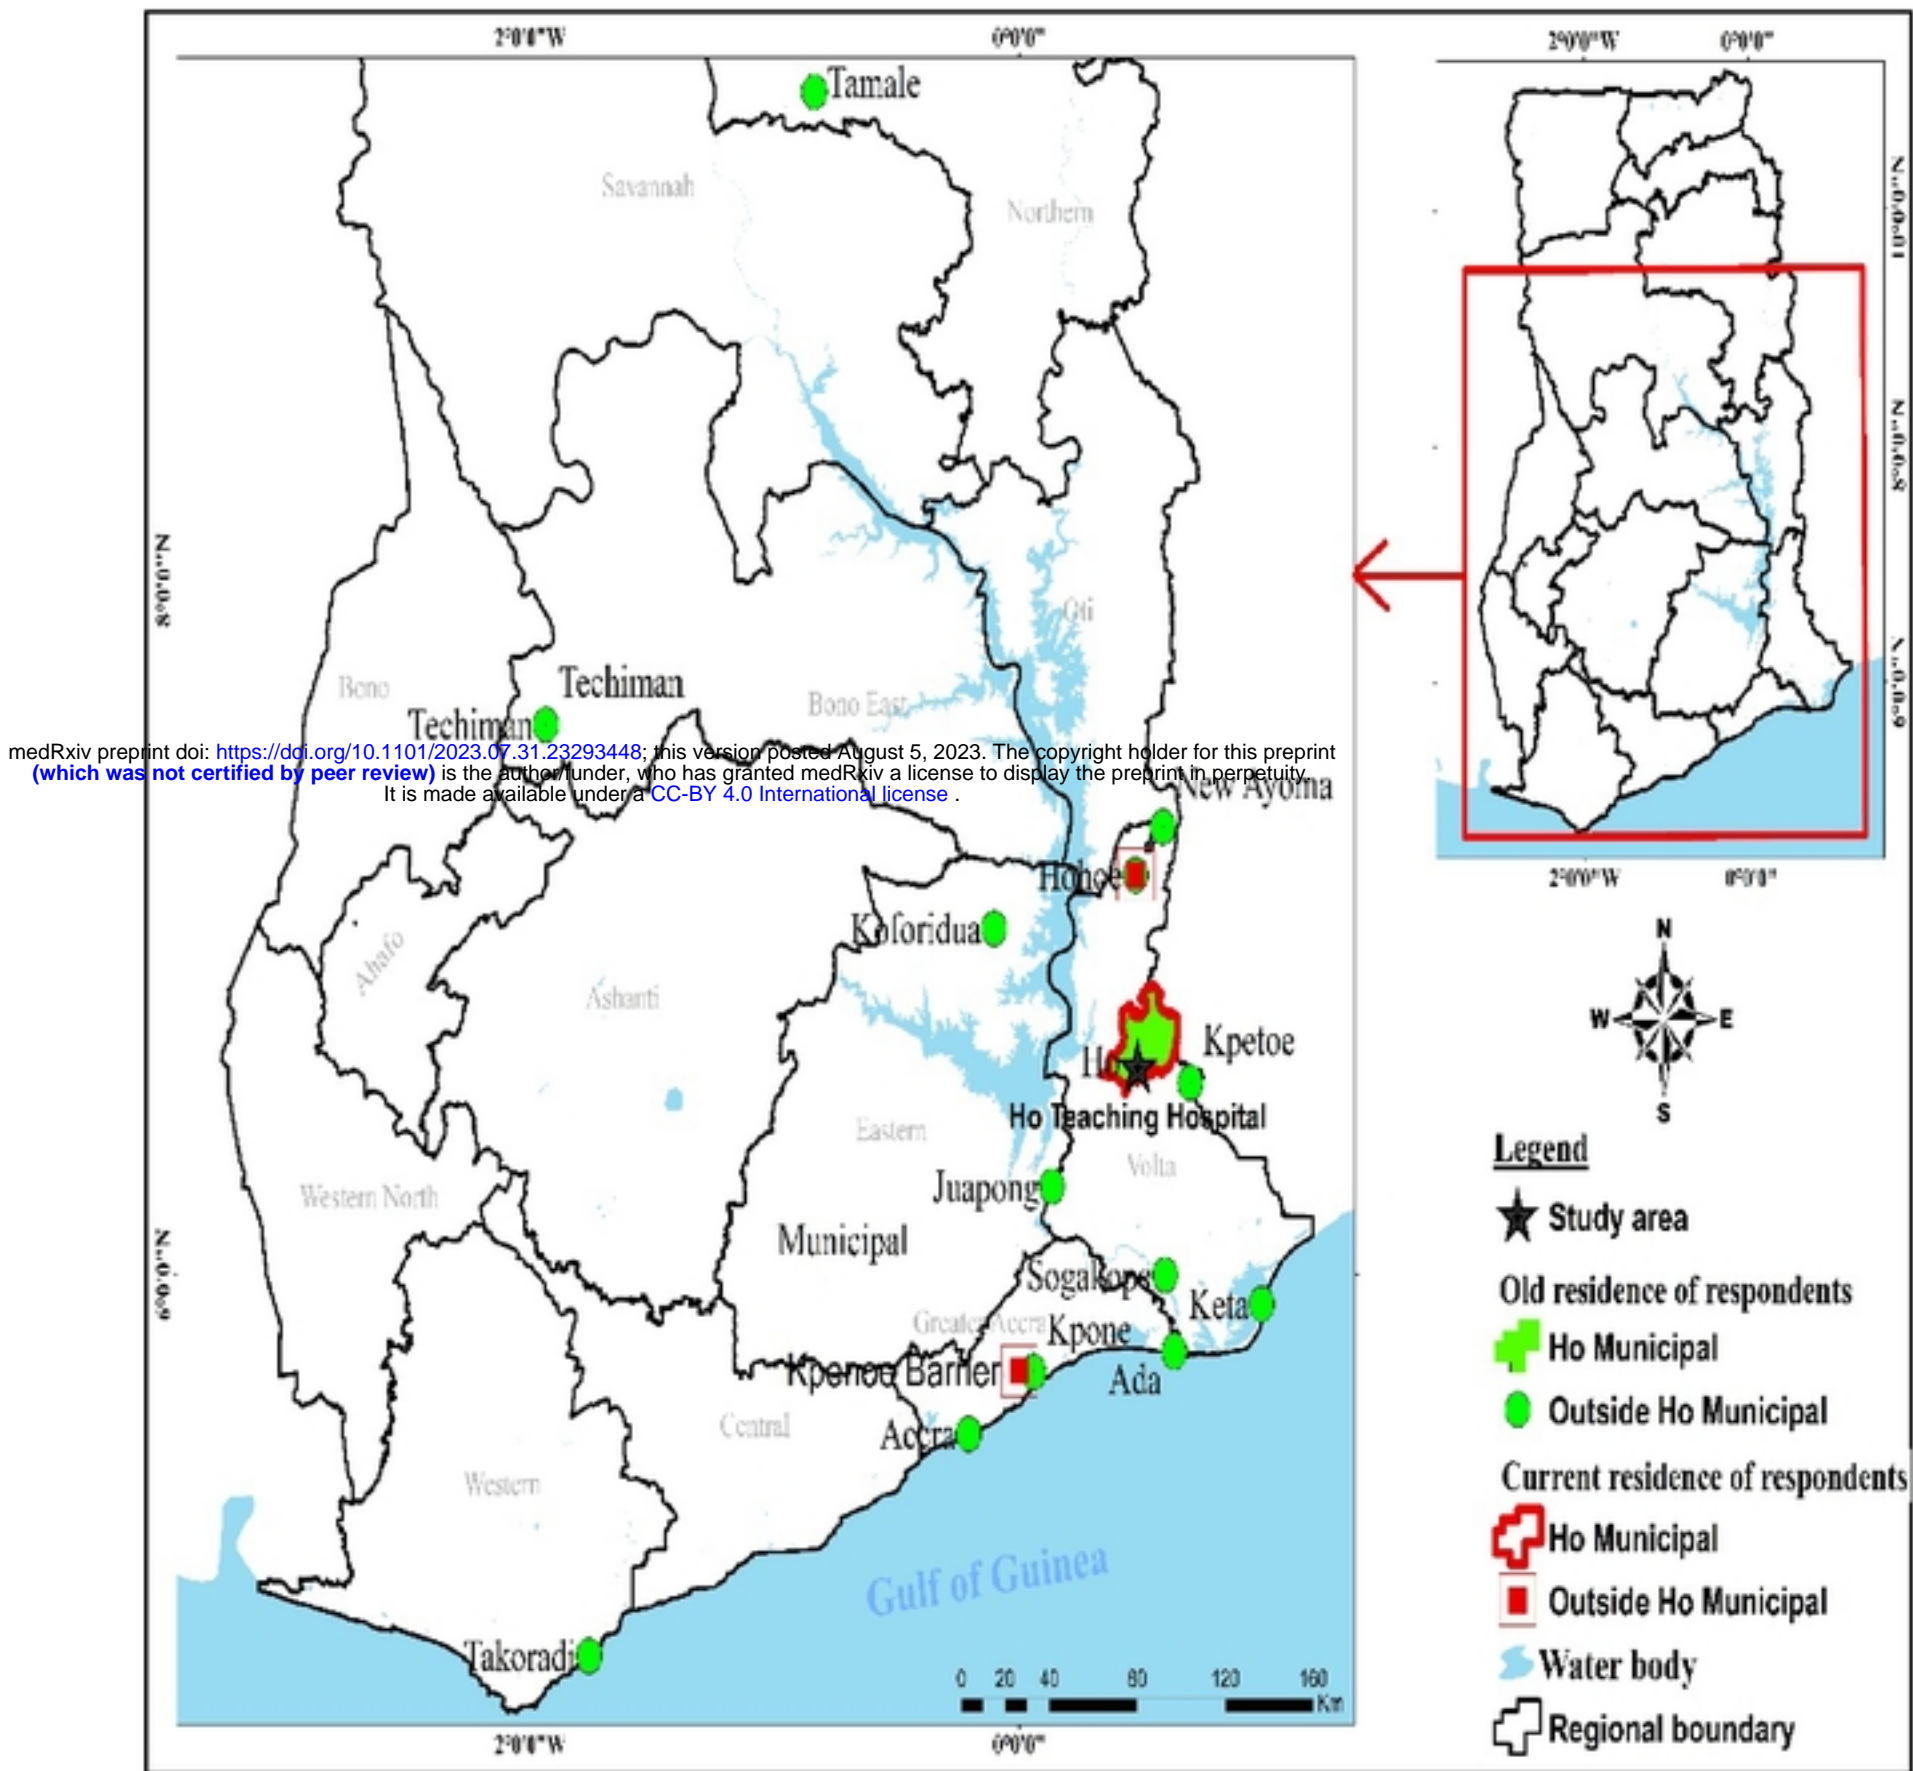

**Figure 1: Map of sampling site showing residences of participants**
